# Supplementary material for: Prevention and management of radiation dermatitis for patients with Nasopharyngeal carcinoma: a best practice implementation project
Source: Research Square preprint supplement (doi:10.21203/rs.3.rs-6925142/v1), 2025-09-09
Supplement: Supplementary file 1 [file 5300a381def29060b7601715.docx]

Radiation Dermatitis Risk Assessment Form

1. Does the treatment regimen include nimotuzumab or cetuximab: □ Yes □No

2. Is the patient's facial and neck skin prone to moisture and sweating: □ Yes □No

3. Does the patient require long-term use of a cervical collar or other neck/face protective devices (causing skin friction): □ Yes □No

4. Patient's neck skin folds:

□ Grade 1: No visible wrinkles, only continuous skin texture

□ Grade 2 (mild): Folds are shallow but with slight indentations, minimal facial creases

□ Grade 3 (Moderate): moderately deep wrinkles, distinct neck folds visible under normal conditions, folds disappear upon neck extension

□ Grade 4 (Severe): very long and deep wrinkles with prominent folds

□ Grade 5 (Very Severe): extremely deep and long wrinkles with pendulous folds

5. Patient history of skin allergies: □ Yes □ No

6. Presence of the following diseases: □ None □ Yes (□ Atopic dermatitis, □ Psoriasis, □ Autoimmune bullous diseases, □ Rheumatoid arthritis, □ Systemic lupus erythematosus, □ Scleroderma, □ Dermatomyositis, □ Xeroderma pigmentosum, □ Ataxia-telangiectasia, □ Fanconi anemia)

7. Patient BMI: □<18.5 □18.5-23.9 □≥24

8. Weight loss exceeding 5% in the past 3 months: □ Yes □ No

9. Patient's knowledge level regarding skin care [Ask 3 questions]:

1) How should the skin be protected when outdoors?

2) What liquids are appropriate for skin cleansing?

3) When should skin protectants be applied?

□ Well mastered (can answer independently)

□ Moderately mastered (can answer correctly with nurse’s prompt)

□ Poorly mastered (cannot answer correctly even after nurse’s prompt; patients with poor mastery are recommended to involve family members in management).

1. Self-care efficacy (assess the patient’s confidence in performing skin care as required):

□ Very low (no confidence at all)

□ Low (occasionally somewhat confident)

□ Moderate (frequently confident)

□ High (confident most of the time)

□ Very high (completely confident)

11. Is a compensator used during radiotherapy: □ Yes □ No

12. Is there any skin damage or infection prior to radiotherapy (scars within the past 6 months): □ Yes □ No

Outcome evaluation criteria:

Currently, the patient is classified as □ Low risk (none of the above items present) □ High risk (any one of items 1–5 or 8–9, item 7 ≥ 24, or item 7 < 18.5 with item 8 present)

Radiation Dermatitis Observation and Assessment Form

Nurse Evaluation Section

1. Site of Radiotherapy:

□ Head and Neck □ Chest □ Abdomen □ Pelvis □ Buttocks/Perineum □ Other site, specify:

1. Completed Radiotherapy Sessions:

3.□ Initial Consultation □ Follow-up Consultation

4. Radiation Dermatitis Grading (RTOG):

Grade 0: Asymptomatic

Grade 1: Mild follicular erythema, hair loss, dry desquamation, decreased sweating;

Grade 2: Tender or bright erythema, patchy moist desquamation, or moderate edema

Grade 3: Confluent moist desquamation excluding skin folds, with pitting edema.

Grade 4: Ulceration, hemorrhage, necrosis.

5. Wound location: □ None □ Left neck □ Right neck □ Face □ Occipital region □ Nasal region □ Left breast □ Right breast □ Anterior chest □ Left axilla □ Right axilla □ Left groin □ Right groin

Wound condition:

(1) Length: cm; Width: cm; Depth: cm; Wound area:

(2) Tunnel: □None □Present: Range points; Deepest points, cm

(3) Wound color: □Pink ( %) □Red ( %) □Yellow ( %) □Black ( %)

(4) Exudate: □None □Present: □Light yellow □Light red □Bright red □Purulent □Other

(5) Exudate volume: □ Small amount of exudate: less than 5 ml in 24 hours, daily area of Mepilex soaked <25%

□ Moderate amount of exudate: 5-10 ml in 24 hours, daily area of Mepilex soaked 25%-75%.

□ Heavy exudate: exudate volume exceeds 10 ml within 24 hours, daily wet area on Mepilex >75%.

(6)Foul odor: □No □Yes

Surrounding skin: □ Normal □Erythema □Pallor □Dryness □Eczema □Induration

6. Nursing Interventions (multiple selections allowed)

□ Health Education (□ General Skin Care □ Use of Skin Protectant □ Nutritional Support □ Smoking and Alcohol Cessation)

□ Wound Cleansing ( Cleansing solution: Normal saline; Sterile water for injection; Hydrogen peroxide; Furacilin solution; Other: )

□ Referral to Wound Care Specialist Clinic / Report to Physician

□ Medication as Prescribed (Medication name: , dropdown selection of common skin protectants )

□ Use of Dressings (Dressing name: )

□ Anti-infective treatment: □ Topical □ Systemic

□ Obtain wound swab (recommended if wound exudate is purulent, malodorous, or if fever is present)

7. Efficacy Evaluation:

**Post-treatment** Wound length: cm; Width: cm; Depth: cm; Wound area:

WSHI：

8. Recommended next follow-up: □ After 1 day □ After 2 days □ After 3 days □ After 1 week

Note: WSHI is used as a relative healing rate indicator to reflect changes in wound area before and after treatment. The WSHI calculation formula is as follows: WSHI = (Pre-treatment wound area - Post-treatment wound area) ÷ Pre-treatment wound area.

**Patient Self-Assessment Section (Nurse Inquiry)**

1. Patient-Reported Skin-Related Subjective Symptoms and Severity (Multiple selections allowed):

① Skin Irritation □ None □ Mild □ Moderate □ Severe □ Very Severe

② Tingling □ None □ Mild □ Moderate □ Severe □ Very Severe

③ Burning Sensation and Prickling □ None □ Mild □ Moderate □ Severe □ Very Severe

④ Warm Sensation □ None □ Mild □ Moderate □ Severe □ Very Severe

⑤Tightness □None □Mild □Moderate □Severe □Very Severe

⑥Pruritus □None □Mild □Moderate □Severe □Very Severe

⑦Pain □None □Mild □Moderate □Severe □Very Severe

⑧Overall Discomfort □None □Mild □Moderate □Severe □Very Severe

⑨Erythema □None □Mild □Moderate □Severe □Very Severe

1. Please describe the extent to which skin symptoms affect your daily life: □None □Slight □Moderate □Considerable □Severe
2. Please describe the extent to which skin symptoms affect your social interactions: □None □Slight □Moderate □Considerable □Severe

4. Do skin symptoms cause you to experience negative emotions: Yes (□Low self-esteem □Anxiety □Depression □Sleep disturbances □Guilt □Worry □Fear □Irritability); No (Skin symptoms do not cause me to experience negative emotions)

5. During the home care period, are you able to adhere to medical staff instructions for skin cleansing and protection? □ Not at all □ Partially completed □ Mostly completed □ Fully completed

6. Do you consider the skin symptoms to have improved effectively? □ Yes □ No
