# Supplementary material for: Prevention and management of radiation dermatitis for patients with Nasopharyngeal carcinoma: a best practice implementation project
Source: Research Square preprint supplement (doi:10.21203/rs.3.rs-6925142/v1), 2025-09-09
Supplement: Supplementary file 2 [file ec2055c2f30036c4195e0a18.docx]

**Questionnaire on Knowledge of Prevention and Management of Radiation Dermatitis**

Dear Colleagues:

   To understand the current knowledge, beliefs, and behaviors of medical staff in our hospital’s radiotherapy-related departments regarding the management of radiation dermatitis, analyze existing issues, and enhance targeted training and guidance, this survey is being conducted. Please complete the relevant sections according to your actual situation and select the options that best reflect your understanding. Completing this questionnaire will take approximately 10–15 minutes. This survey is anonymous and strictly confidential. Please answer sincerely based on your actual situation, and feel free to respond. Thank you for your support and cooperation! All responses are for statistical analysis and academic research purposes only. We sincerely appreciate your kind collaboration.

Sun Yat-sen University Cancer Center, Department of Radiotherapy

1. Your age [ Fill-in-the-blank ]

_________________________________

2. Your gender [ Single choice ]

| ○ Male |
| --- |
| ○ Female |

3. Your highest educational qualification [ Single choice ]

| ○ Secondary vocational school |
| --- |
| ○ Junior college |
| ○ Bachelor’s degree |
| ○ Master’s degree or higher |

4. Your years of work experience years [ Fill-in-the-blank ] _________________________________

5. Your professional title [ Single choice ]

| ○ Nurse |
| --- |
| ○ Registered Nurse |
| ○ Charge Nurse |
| ○ Deputy Chief Nurse and above |

6. Your Position [ Single Choice Question ]

| ○ Clinical Nurse |
| --- |
| ○ Nursing Team Leader |
| ○ Education Nurse (Departmental Preceptor) |
| ○ Head Nurse |

7. Your Level [ Single Choice Question ]

| ○N0 |
| --- |
| ○N1 |
| ○N2 |
| ○N3 |
| ○N4 |
| ○N5 and above |

8. Does your department have protocols or guidelines related to the management of radiation dermatitis? [ Single Choice Question ]

| ○ Yes |
| --- |
| ○ No |

9. Does your knowledge of radiation dermatitis adequately meet clinical requirements?

| ○ Cannot |
| --- |
| ○ Basically can |
| ○ Completely can |

10. Have you received training related to radiation dermatitis?

| ○ Yes |
| --- |
| ○ No |

The following content assesses knowledge related to radiation dermatitis (Knowledge). The results are solely for feedback on your mastery of radiation dermatitis knowledge.

13. ( K ) Regarding the risk factors of radiation dermatitis, my level of understanding is

|  | Completely unaware | Unaware | Uncertain | Aware | Completely aware |
| --- | --- | --- | --- | --- | --- |
| Relatively short neck shape, neck skin folds | ○ | ○ | ○ | ○ | ○ |
| Use of immobilization masks, skin friction, skin moisture and sweating, sun exposure, and exposure to extreme temperatures | ○ | ○ | ○ | ○ | ○ |
| Nutritional status, age, race and ethnicity, obesity, and smoking | ○ | ○ | ○ | ○ | ○ |
| Skin radiation dose, radiation fractionation method, radiotherapy technique and beam energy, and whether a local boost is applied ; Concurrent chemotherapy or other medical photosensitizing adjunct therapies | ○ | ○ | ○ | ○ | ○ |
| Pre-existing skin diseases ( such as atopic eczema, psoriasis, or autoimmune blistering diseases ); Comorbidities including rheumatoid arthritis, lupus erythematosus, or scleroderma ; Diagnosed with genetic repair disorders, such as xeroderma pigmentosum, ataxia-telangiectasia, Fanconi anemia, and others. | ○ | ○ | ○ | ○ | ○ |

14. ( K ) I am aware that the clinical manifestations of radiation dermatitis include

|  | Completely unaware | Unaware | Uncertain | Aware | Completely aware |
| --- | --- | --- | --- | --- | --- |
| Reversible alopecia | ○ | ○ | ○ | ○ | ○ |
| Dry desquamation and pruritus | ○ | ○ | ○ | ○ | ○ |
| Hyperpigmentation | ○ | ○ | ○ | ○ | ○ |
| Erythema | ○ | ○ | ○ | ○ | ○ |
| Skin ulceration and necrosis | ○ | ○ | ○ | ○ | ○ |

15. ( K ) I am aware of the assessment tools for radiation dermatitis

|  | Completely unaware | Unaware | Uncertain | Aware | Completely aware |
| --- | --- | --- | --- | --- | --- |
| Acute Radiation Dermatitis Reaction Assessment Scale (the Radiation-Induced Skin Reaction Assessment Scale, RISRAS) | ○ | ○ | ○ | ○ | ○ |
| Radiation Therapy Oncology Group Scoring Criteria (Radiation Therapy Oncology Group, RTOG) | ○ | ○ | ○ | ○ | ○ |
| Common Terminology Criteria for Adverse Events (Common Terminology Criteria for Adverse Events, CTCAE) | ○ | ○ | ○ | ○ | ○ |
| Skin Toxicity Assessment Tool (Skin Toxicity Assessment Tool, STAT) | ○ | ○ | ○ | ○ | ○ |

16. (K) I am aware of the number of grades in the Common Terminology Criteria for Adverse Events (CTCAE).

| ○1；2；3；4；5 |
| --- |
| ○1；2；3；4 |
| ○0；1；2；3；4 |
| ○0；1；2；3；4；5 |

17. (K) According to the RTOG scoring criteria, I know the highest severity grade is ______. [Fill-in-the-blank question]

_________________________________

18. ( K ) According to the RTOG grading criteria, the following description best corresponds to Radiation Dermatitis Grade 2

| ○ No change |
| --- |
| ○ Mild follicular erythema, hair loss, dry desquamation, decreased sweating; |
| ○ Tender or bright red erythema, sheet-like moist desquamation / moderate edema |
| ○ Confluent moist desquamation except in skin folds, pitting edema |
| ○ Ulceration, bleeding, necrosis. |

19. ( K ) According to the RTOG grading criteria, the following description best corresponds to Radiation Dermatitis Grade 3

| ○ No change |
| --- |
| ○ Mild follicular erythema, hair loss, dry desquamation, decreased sweating; |
| ○ Tender or bright red erythema, sheet-like moist desquamation / moderate edema |
| ○ Confluent moist desquamation except in skin folds, pitting edema |
| ○ Ulceration, bleeding, necrosis. |

20. (K) According to the CTCAE grading criteria, the following description best corresponds to Radiation Dermatitis Grade 2

| ○ Moderate to severe erythema, sheet-like moist desquamation, predominantly localized to skin folds and wrinkles, moderate edema |
| --- |
| ○ Mild erythema or dry desquamation, decreased sweating; |
| ○ Moist desquamation not confined to wrinkles and skin folds; minor injury or friction may cause bleeding |
| ○ Life-threatening; skin necrosis or dermal ulceration; bleeding at the affected site; requires skin grafting |

21. ( K ) According to the CTCAE grading criteria, the following description best corresponds to Grade 4 Radiation Dermatitis

| ○ Moderate to severe erythema, sheet-like moist desquamation, predominantly localized to skin folds and wrinkles, moderate edema |
| --- |
| ○ Mild erythema or dry desquamation, decreased sweating; |
| ○ Moist desquamation not confined to wrinkles and skin folds; minor injury or friction may cause bleeding |
| ○ Life-threatening; skin necrosis or dermal ulceration; bleeding at the affected site; requires skin grafting |

22. ( K ) I understand that collecting detailed personal and family history related to patient risk factors is essential for assessing the risk of radiation dermatitis.

| ○ Yes |
| --- |
| ○ No |

23. ( K ) I understand that, compared with radiotherapy alone or radiotherapy combined with chemotherapy, radiotherapy combined with () is associated with earlier onset and more severe radiation dermatitis.

| ○ Nimotuzumab |
| --- |
| ○ Cetuximab |
| ○ Immune checkpoint inhibitors |
| ○ Anti-angiogenic agents (Apatinib, recombinant human endostatin, etc.) |

24. ( K ) I understand that for radiation dermatitis associated with radiotherapy combined with cetuximab treatment, grades 1–2 may continue treatment following active symptomatic management, whereas grades 3–4 require suspension of cetuximab until adverse reactions subside to below grade 2; radiotherapy should be suspended if necessary.

| ○ Yes |
| --- |
| ○ No |

25. ( K ) I am aware of the daily care measures for radiation dermatitis; please respond truthfully

|  | Completely unaware | Unaware | Uncertain | Aware | Completely aware |
| --- | --- | --- | --- | --- | --- |
| Maintain the skin clean and dry, and avoid perspiration. Hands should be washed before contacting the skin in the radiotherapy area, and after washing, gently pat dry with a clean towel. | ○ | ○ | ○ | ○ | ○ |
| Use warm water ( water temperature 38-40℃) and soap with a pH value of 5 (neutral) and/or body wash to cleanse the skin, no more than 2 times daily. When the skin is sensitive or exhibits moist desquamation, cleanse with water only. | ○ | ○ | ○ | ○ | ○ |
| Use fragrance-free moisturizer to hydrate dry skin; it is recommended to use moisturizers containing urea (3%) and/or a high glycerin content. | ○ | ○ | ○ | ○ | ○ |
| Avoid using skin irritants, such as alcohol-containing lotions and perfumes. | ○ | ○ | ○ | ○ | ○ |
| Use a sharp, clean multi-blade wet razor or electric razor for shaving to avoid local trauma. | ○ | ○ | ○ | ○ | ○ |
| Avoid causing minor skin injuries, such as friction from clothing, direct sunlight exposure, and extreme temperature exposure; avoid applying tapes and adhesives to the irradiated area. | ○ | ○ | ○ | ○ | ○ |
| It is not recommended to use creams or other skincare products within 4 hours before treatment to prevent the occurrence of an “accumulation” effect. | ○ | ○ | ○ | ○ | ○ |
| Wear loose, low-collar, breathable clothing to minimize friction on the radiotherapy site. | ○ | ○ | ○ | ○ | ○ |

26. (K) I am aware of the health education regarding radiation dermatitis care; please respond truthfully according to your understanding.

|  | Completely unaware | Unaware | Uncertain | Aware | Completely aware |
| --- | --- | --- | --- | --- | --- |
| Photographic documentation of skin reactions at all severity levels in patients | ○ | ○ | ○ | ○ | ○ |
| Providing patients with education on skin care | ○ | ○ | ○ | ○ | ○ |
| Receiving training on the management of radiation dermatitis | ○ | ○ | ○ | ○ | ○ |
| Providing patients with health education manuals on managing skin reactions, and advising them to use care diaries to record daily skin reactions | ○ | ○ | ○ | ○ | ○ |
| Educating patients to refrain from smoking | ○ | ○ | ○ | ○ | ○ |
| Instructing patients to keep the skin clean and dry, avoid sweating, wash hands before touching the skin in the radiotherapy area, and gently pat dry with a clean towel | ○ | ○ | ○ | ○ | ○ |

27. ( K ) I am aware of the prevention and treatment methods for radiation dermatitis (please answer truthfully)

|  | Completely unaware | Unaware | Uncertain | Aware | Completely aware |
| --- | --- | --- | --- | --- | --- |
| Olive oil can be used to prevent acute radiation dermatitis in patients with nasopharyngeal carcinoma. | ○ | ○ | ○ | ○ | ○ |
| The use of soft silicone film dressing can reduce the incidence of grade 2 radiation dermatitis in patients with head and neck cancer but has no effect on the incidence of > 2 grade radiation dermatitis and moist desquamation. | ○ | ○ | ○ | ○ | ○ |
| Skin protective sprays containing peroxidized fatty acids can effectively prevent the occurrence of > 2 grade radiation dermatitis in patients with head and neck cancer and reduce the incidence of > 2 grade radiation dermatitis. | ○ | ○ | ○ | ○ | ○ |
| Avoid using skin irritants, such as alcohol-containing lotions and perfumes. | ○ | ○ | ○ | ○ | ○ |
| Topical application of triethanolamine cream during radiotherapy can reduce the incidence of > 2 grade radiation dermatitis in patients with nasopharyngeal carcinoma. | ○ | ○ | ○ | ○ | ○ |
| Soft silicone dressings can shorten the healing time of radiation dermatitis wounds in patients with head and neck tumors and alleviate pain caused by radiation dermatitis to a certain extent. | ○ | ○ | ○ | ○ | ○ |
| Nutritional support therapy can reduce the incidence of 3~4 grade radiation dermatitis in patients with nasopharyngeal carcinoma. | ○ | ○ | ○ | ○ | ○ |
| Avoid radiation dosimetric issues. Soft zinc preparations should be removed before radiotherapy, whereas soft silicone film dressings and film-forming organosilicone gels do not require removal prior to radiotherapy. | ○ | ○ | ○ | ○ | ○ |

28. ( K ) I am aware of the appropriate timing for follow-up monitoring of radiation dermatitis

|  | Completely unaware | Unaware | Uncertain | Aware | Completely aware |
| --- | --- | --- | --- | --- | --- |
| High-risk patients for radiation dermatitis should be monitored once per week 1 time ; | ○ | ○ | ○ | ○ | ○ |
| With the onset of erythema, increase the monitoring frequency to a maximum of twice per week | ○ | ○ | ○ | ○ | ○ |
| When moist peeling or bleeding scabs occur, evaluate the necessity of daily follow-up | ○ | ○ | ○ | ○ | ○ |

29. ( K ) I am aware of the management of wound infection in patients with radiation dermatitis

|  | Completely unaware | Unaware | Uncertain | Aware | Completely aware |
| --- | --- | --- | --- | --- | --- |
| Prophylactic use of antibiotics is not recommended | ○ | ○ | ○ | ○ | ○ |
| Daily application of glucocorticoid ointment (1–2 weeks ) to alleviate inflammatory response | ○ | ○ | ○ | ○ | ○ |
| When infection is suspected, it is recommended to obtain wound swabs to identify infectious agents and to assess blood leukocyte count. If sepsis and/or fever or other symptoms are present, blood cultures should be performed. | ○ | ○ | ○ | ○ | ○ |
| If cultures are positive or infection is confirmed, local or systemic antibiotic therapy should be considered. | ○ | ○ | ○ | ○ | ○ |

The following section assesses nurses’ attitudes and beliefs regarding radiation dermatitis ( Attitude ). The results are intended solely to evaluate your perspectives and attitudes toward radiation dermatitis.

30. (A) I believe that nurses should possess comprehensive knowledge and practical skills related to radiation dermatitis

| ○ Strongly Disagree |
| --- |
| ○ Somewhat Disagree |
| ○ Uncertain |
| ○ Somewhat Agree |
| ○ Strongly Agree |

31. (A) I believe that nurses having extensive knowledge of radiation dermatitis significantly benefits their clinical practice

| ○ Strongly Disagree |
| --- |
| ○ Somewhat Disagree |
| ○ Uncertain |
| ○ Somewhat Agree |
| ○ Strongly Agree |

32. (A) I believe that departmental or hospital training on radiation dermatitis for nurses and physicians is essential

| ○ Strongly Disagree |
| --- |
| ○ Somewhat Disagree |
| ○ Uncertain |
| ○ Somewhat Agree |
| ○ Strongly Agree |

33. (A) I believe that establishing nursing standards and procedures for the prevention and management of radiation dermatitis is essential

| ○ Strongly Disagree |
| --- |
| ○ Somewhat Disagree |
| ○ Uncertain |
| ○ Somewhat Agree |
| ○ Strongly Agree |

34. (A) I believe that the occurrence of radiation dermatitis is positively correlated with the severity of the patient's condition and adverse prognosis

| ○ Strongly Disagree |
| --- |
| ○ Somewhat Disagree |
| ○ Uncertain |
| ○ Somewhat Agree |
| ○ Strongly Agree |

35. (A) I believe that radiation dermatitis is preventable

| ○ Strongly Disagree |
| --- |
| ○ Somewhat Disagree |
| ○ Uncertain |
| ○ Somewhat Agree |
| ○ Strongly Agree |

36. (A) I believe that managing radiation dermatitis requires the participation of a multidisciplinary support team ( physicians, nutritionists, nurses, and stoma therapists )

| ○ Strongly Disagree |
| --- |
| ○ Somewhat Disagree |
| ○ Uncertain |
| ○ Somewhat Agree |
| ○ Strongly Agree |

37. (A) I believe that nurses should thoroughly understand and document the risk factors of radiation dermatitis in patients

| ○ Strongly Disagree |
| --- |
| ○ Somewhat Disagree |
| ○ Uncertain |
| ○ Somewhat Agree |
| ○ Strongly Agree |

38. (A) I believe that nurses play a vital role in the prevention, monitoring, and management of radiation dermatitis.

| ○ Strongly Disagree |
| --- |
| ○ Somewhat Disagree |
| ○ Uncertain |
| ○ Somewhat Agree |
| ○ Strongly Agree |

39. (A) I believe that there are issues with non-standard management of radiation dermatitis in my clinical practice.

| ○ Strongly Disagree |
| --- |
| ○ Somewhat Disagree |
| ○ Uncertain |
| ○ Somewhat Agree |
| ○ Strongly Agree |

40. (A) I believe that when I encounter problems in radiation dermatitis management at work, I am unsure how to resolve them or seek assistance.

| ○ Strongly Disagree |
| --- |
| ○ Somewhat Disagree |
| ○ Uncertain |
| ○ Somewhat Agree |
| ○ Strongly Agree |

41. (A) I believe that nurses should be proficient in the assessment, prevention and treatment, monitoring, daily care, and health education related to radiation dermatitis.

| ○ Strongly Disagree |
| --- |
| ○ Somewhat Disagree |
| ○ Uncertain |
| ○ Somewhat Agree |
| ○ Strongly Agree |

42. (A) I believe that enhancing the standardization of radiation dermatitis management by nurses can reduce the incidence of severe radiation dermatitis in patients.

| ○ Strongly Disagree |
| --- |
| ○ Somewhat Disagree |
| ○ Uncertain |
| ○ Somewhat Agree |
| ○ Strongly Agree |

43. (A) I believe that nurses dynamically assess the severity of radiation dermatitis in radiotherapy patients and adjust the follow-up frequency accordingly, which facilitates timely detection and management of radiation dermatitis

| ○ Strongly Disagree |
| --- |
| ○ Somewhat Disagree |
| ○ Uncertain |
| ○ Somewhat Agree |
| ○ Strongly Agree |

44. (A) I believe that standardized assessment and management of radiation dermatitis in radiotherapy patients increases my workload

| ○ Strongly Disagree |
| --- |
| ○ Somewhat Disagree |
| ○ Uncertain |
| ○ Somewhat Agree |
| ○ Strongly Agree |

The following content relates to practices concerning radiation dermatitis management ( Practice ); please complete it truthfully.

45. ( P ) I proactively participate in the development of nursing standards and procedures for radiation dermatitis

| ○ Never |
| --- |
| ○ Occasionally |
| ○ Sometimes |
| ○ Often |
| ○ Always |

46. ( P ) I proactively study knowledge related to radiation dermatitis.

| ○ Never |
| --- |
| ○ Occasionally |
| ○ Sometimes |
| ○ Often |
| ○ Always |

47. ( P ) At work, I pay attention to patients' risk factors for radiation dermatitis and use the CTCAE or RTOG scales to assess the severity of radiation dermatitis.

| ○ Never |
| --- |
| ○ Occasionally |
| ○ Sometimes |
| ○ Often |
| ○ Always |

48. ( P ) According to the RTOG grading criteria, what grade of radiation dermatitis does the patient in the image have?


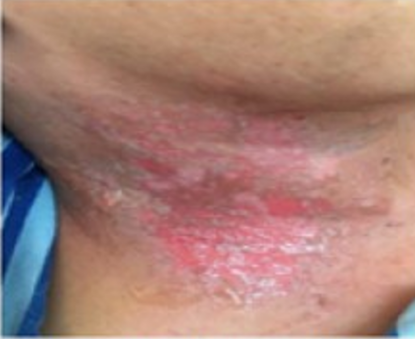


| ○0 |
| --- |
| ○1 |
| ○2 |
| ○3 |
| ○4 |

49.

( P ) According to the RTOG grading criteria, what grade of radiation dermatitis does the patient in the image have?


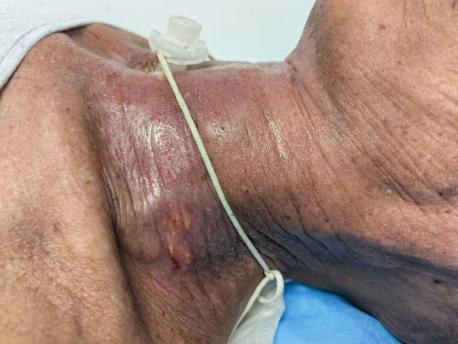


| ○0 |
| --- |
| ○1 |
| ○2 |
| ○3 |
| ○4 |

50. ( P ) According to the RTOG grading criteria, the patient in the image has radiation dermatitis of grade


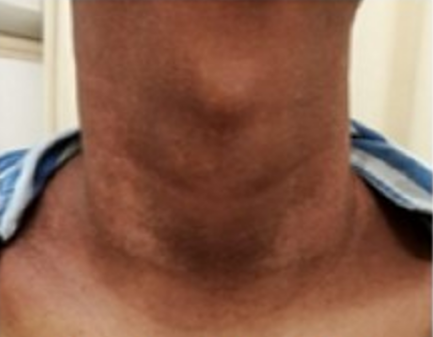


| ○0 |
| --- |
| ○1 |
| ○2 |
| ○3 |
| ○4 |
| ○5 |

51. ( P ) According to the RTOG grading criteria, the patient in the image has radiation dermatitis of grade


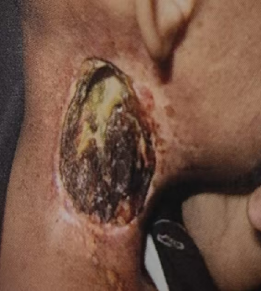


| ○0 |
| --- |
| ○1 |
| ○2 |
| ○3 |
| ○4 |

52. ( P ) According to the RTOG grading criteria, the patient in the image has radiation dermatitis of grade


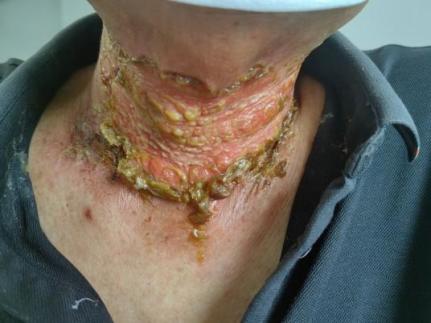


| ○0 |
| --- |
| ○1 |
| ○2 |
| ○3 |
| ○4 |

53. ( P ) For patients initiating radiotherapy, I utilize a radiation dermatitis risk assessment tool to evaluate the patient’s risk level of radiation dermatitis

| ○ Never |
| --- |
| ○ Occasionally |
| ○ Sometimes |
| ○ Often |
| ○ Always |

54. ( P ) I guide patients to receive professional health education prior to radiotherapy/ I instruct patients on radiotherapy-related precautions before treatment

| ○ Never |
| --- |
| ○ Occasionally |
| ○ Sometimes |
| ○ Often |
| ○ Always |

55. ( P ) For radiation dermatitis of grade ≥2, I inquire about the patient’s subjective sensations at the dermatitis site, document the extent of dermatitis, wound color, presence or absence of exudate, and promptly report to the supervising physician

| ○ Never |
| --- |
| ○ Occasionally |
| ○ Sometimes |
| ○ Often |
| ○ Always |

56. ( P ) In my work, for patients who have developed radiation dermatitis, I document each occurrence in the nursing record system.

| ○ Never |
| --- |
| ○ Occasionally |
| ○ Sometimes |
| ○ Often |
| ○ Always |

57. ( P ) I provide targeted guidance to patients according to the different grades of their radiation dermatitis.

| ○ Never |
| --- |
| ○ Occasionally |
| ○ Sometimes |
| ○ Often |
| ○ Always |

58. ( P ) ≤1 Grade dermatitis: I instruct patients to perform daily care, avoid skin friction, maintain skin hydration, and practice proper hand hygiene.

| ○ Never |
| --- |
| ○ Occasionally |
| ○ Sometimes |
| ○ Often |
| ○ Always |

59. ( P ) >2 Grade dermatitis: I advise patients to keep the skin clean, recommend the use of moisturizers, selectively apply topical antimicrobials and corticosteroid creams, and administer oral or intravenous antibiotics as treatment; use hydrogel for wound debridement and hydrocolloid dressings to protect ulcerated areas. When the amount of exudate is significant, instruct the patient to use hydrophilic fiber dressings, calcium alginate dressings, polyurethane, or silicone foam dressings.

| ○ Never |
| --- |
| ○ Occasionally |
| ○ Sometimes |
| ○ Often |
| ○ Always |

60. ( P ) When suspecting infection at the site of skin damage in a patient, I recommend that the physician collect wound swabs to identify infectious agents and assess the blood leukocyte count. If sepsis and/or other symptoms such as fever are present, consult the physician regarding further examinations (e.g., blood cultures).

| ○ Never |
| --- |
| ○ Occasionally |
| ○ Sometimes |
| ○ Often |
| ○ Always |

61. ( P ) In my work, I closely monitor the skin condition at the radiotherapy site. At the start of radiotherapy, monitoring is performed once per week; with the appearance of erythema, the monitoring frequency is increased to twice per week; When moist peeling or bleeding scabs occur, assess the necessity of daily follow-up.

| ○ Never |
| --- |
| ○ Occasionally |
| ○ Sometimes |
| ○ Often |
| ○ Always |

62. ( P ) In my work, I repeatedly emphasize health education to patients and assess their comprehension.

| ○ Never |
| --- |
| ○ Occasionally |
| ○ Sometimes |
| ○ Often |
| ○ Always |

63. ( P ) For discharged patients, I instruct them to seek medical assistance if radiation dermatitis occurs (attending physician, radiotherapy nursing clinic, wound and ostomy specialist).

| ○ Never |
| --- |
| ○ Occasionally |
| ○ Sometimes |
| ○ Often |
| ○ Always |
